# Supplementary material
Source: publisher site journal article supplement (https://www.dovepress.com/article/476686)
Supplement: Supplementary file 1 [file get_supplementary_file.php]

**Supporting Information**

Figure S1 The antibacterial effect of Cur and Cur/Se nanoparticles against (a) *Escherichia coli* and (b) *Staphylococcus aureus.*
